# Supplementary material
Source: PubMed Central journal article supplement (PMC4326598)

**A**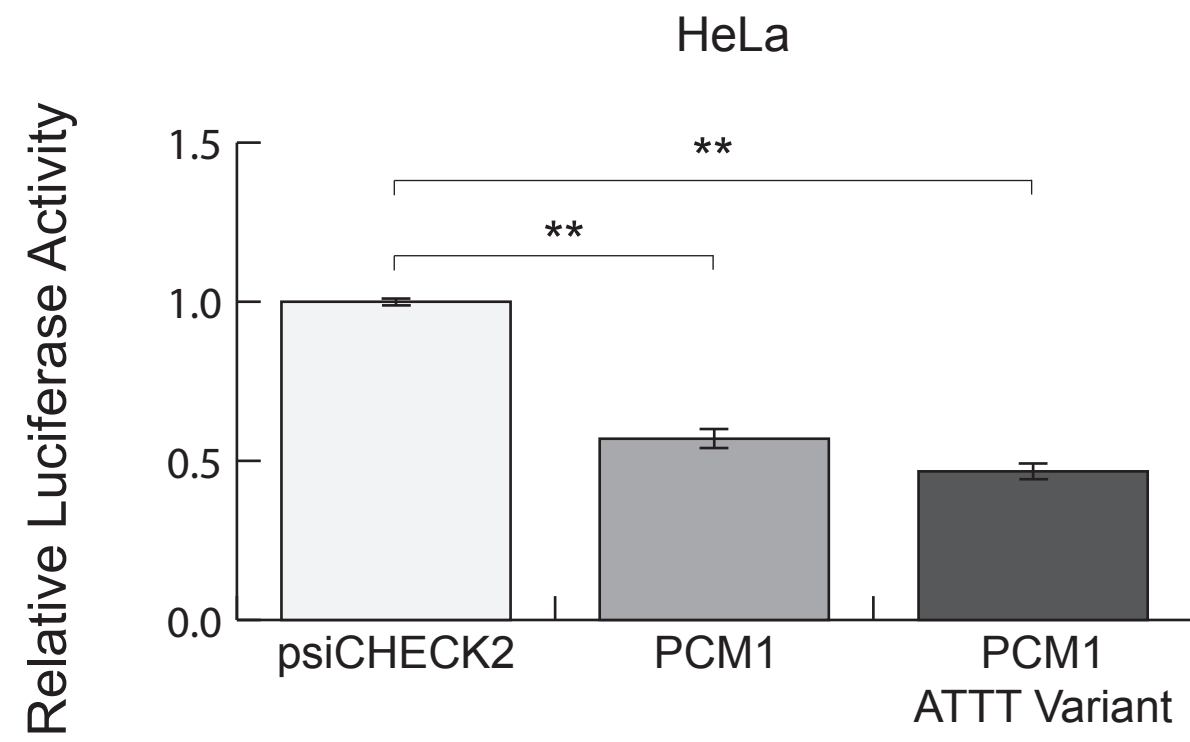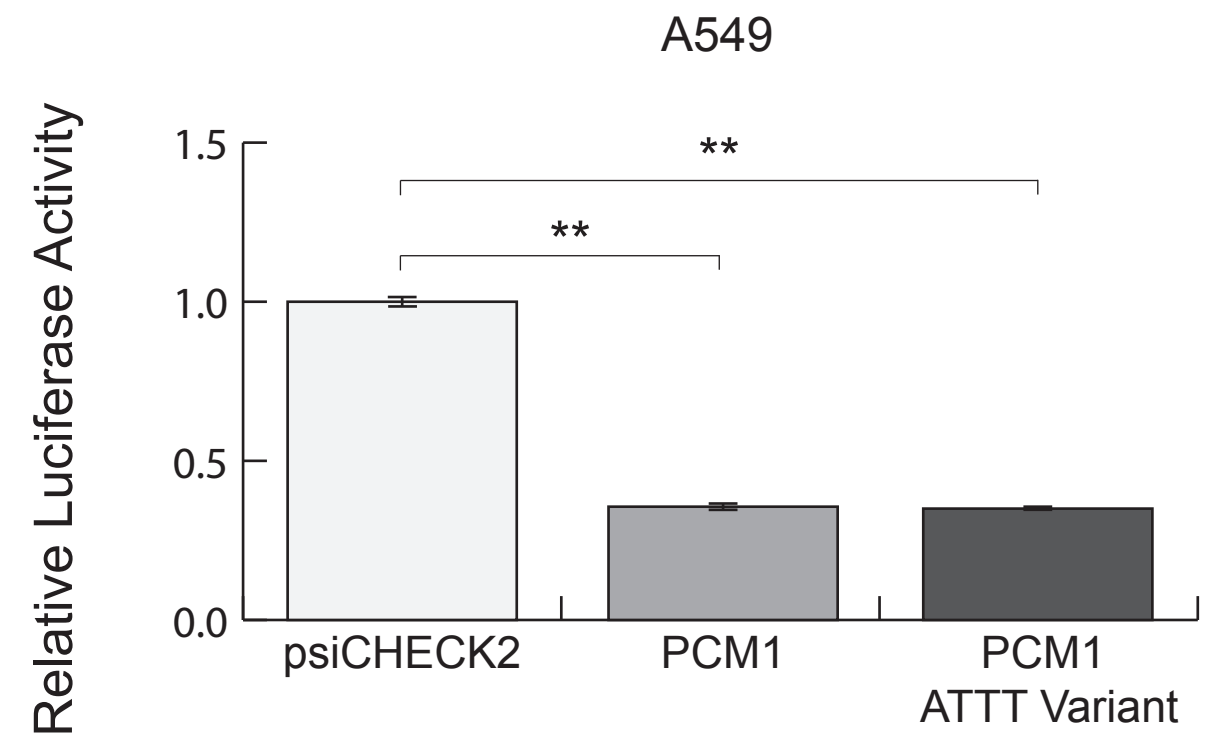**B**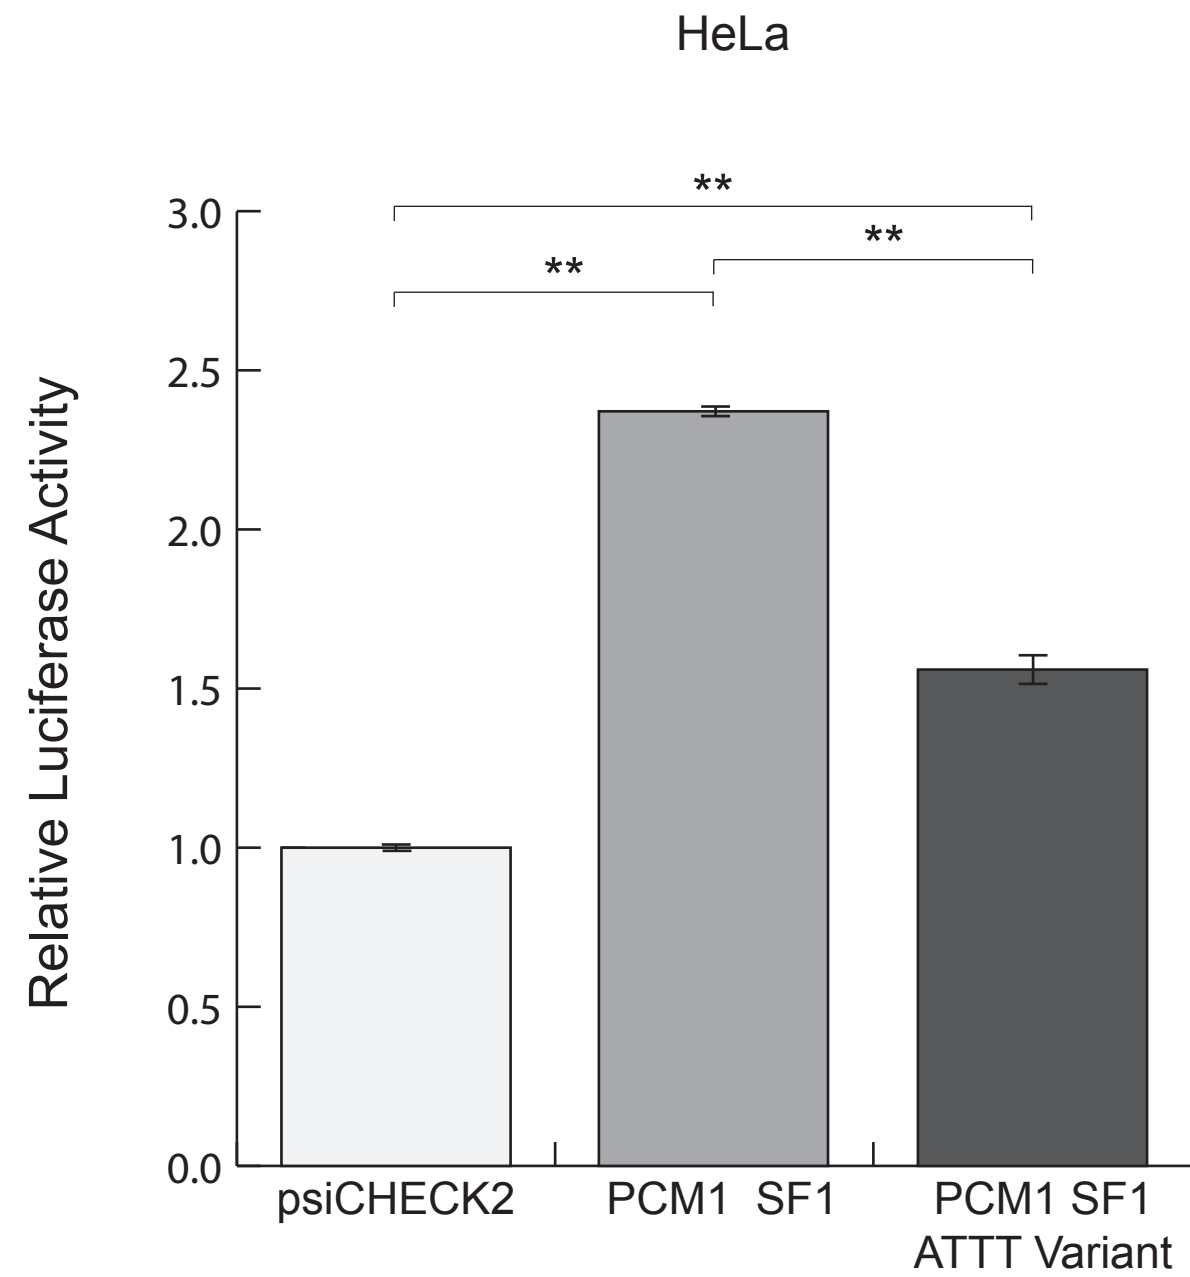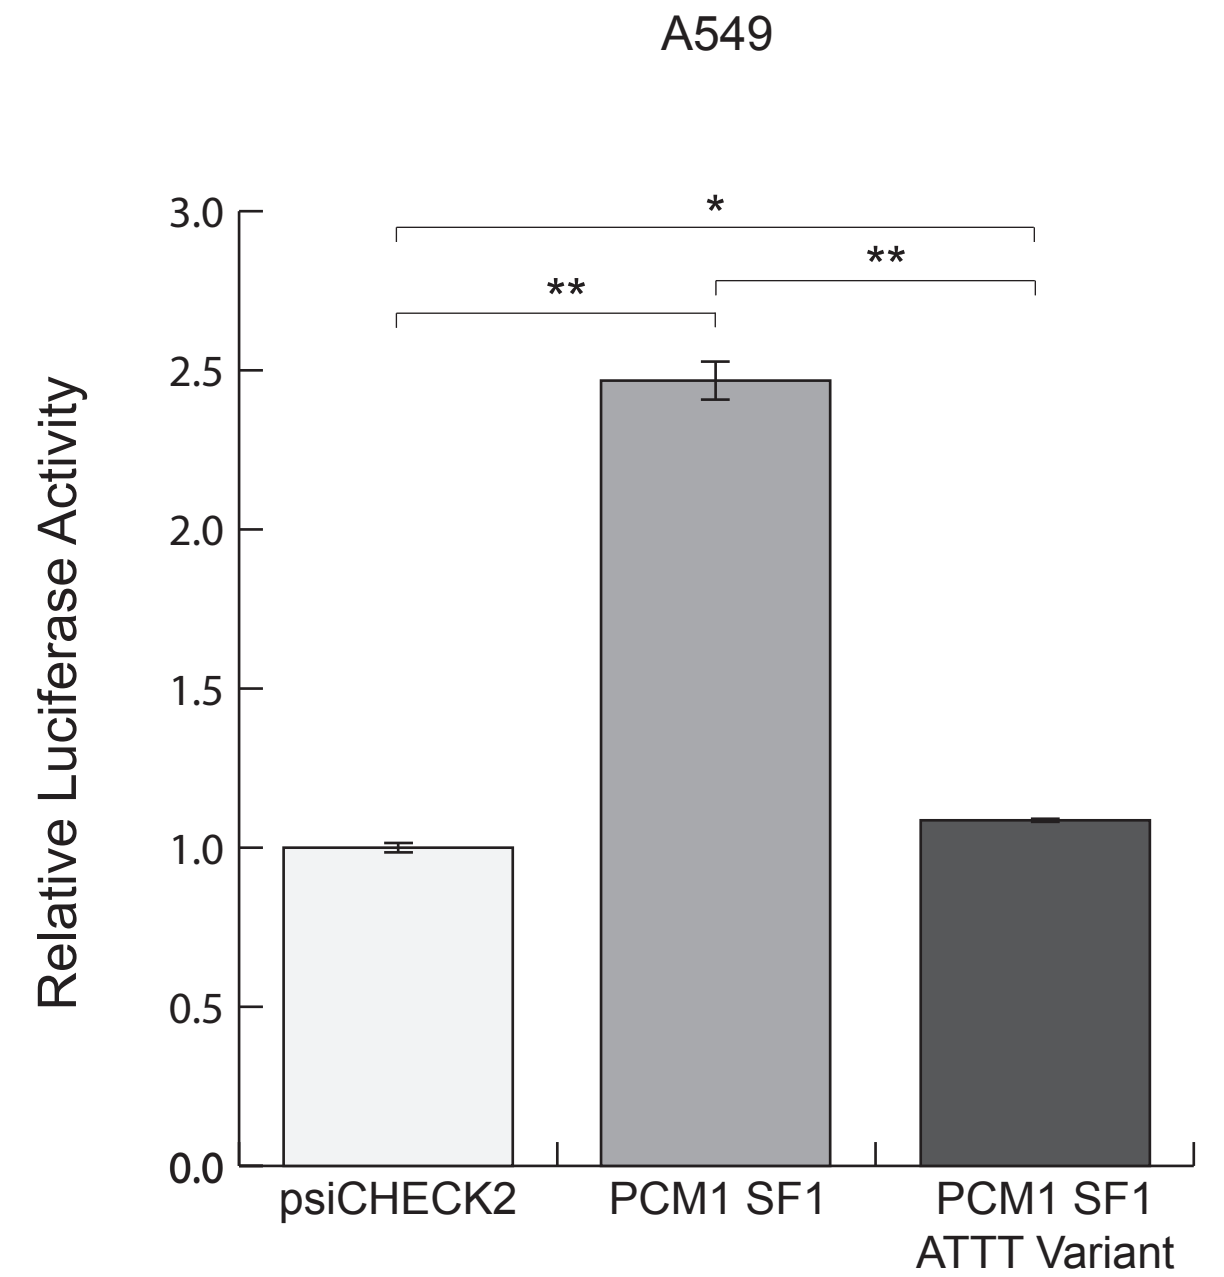

Supplement: NIHMS658690-supplement-SupplFig_3.pdf [file NIHMS658690-supplement-SupplFig_3.pdf]
